# Supplementary material for: Can mouse models mimic sporadic Alzheimer’s disease?
Source: PubMed Central journal article supplement — Neural Regen Res. 2019 Sep 26;15(3):401–6. doi: 10.4103/1673-5374.266046 (PMC6921354; doi:10.4103/1673-5374.266046), 2019-09-26
Supplement: NRR-15-401_Suppl2.pdf [file NRR-15-401_Suppl2.pdf]

## OPEN PEER REVIEW REPORT 2

**Name of journal:** Neural Regeneration Research

**Manuscript NO:** NRR-D-19-00145

**Title:** Can mouse models mimic sporadic Alzheimer's disease?

**Reviewer's Name:** Zhefan Stephen Chen

**Reviewer's country:** China

**Date sent for review:** 2019-03-20

**Date reviewed:** 2019-03-31

**Review time:** 11 Days

### COMMENTS TO AUTHORS

This paper summarizes the recent trails and difficulties in developing mouse models that mimic the sporadic AD. This is a well-organized and written review article, I only have two minor comments:

1. The link <https://www.alzforum.org/res/com> in Page 3 is invalid, it showed 'file not found' when I clicked into it. Could authors double check and provide an available link?
2. In Page 6, 'that many risk factors are linked to AD progression, such as as e.g. diabetes and high fat diet', delete one of the 'as'.
